# Supplementary material for: Associations of Umbilical Cord Blood Amino Acid Profiles and Insulin-Like Growth Factor 1 With Birth Weight
Source: Research Square preprint supplement (doi:10.21203/rs.3.rs-8446599/v1), 2026-01-16

**Supplementary Figure 1:**

**Scatter plot showing the relationship between IGF-1 levels and birth weight (SD)**
This figure illustrates the association between serum IGF-1 concentration (ng/mL) and birth weight expressed as standard deviation (SD) scores. Each dot represents an individual neonate. No clear linear correlation was observed between IGF-1 levels and birth weight in the study population.

**Supplementary Table 1:** Distribution of Maternal and Neonatal Comorbidities in LFD and AFD Groups

|  |  | Light-for-dates Infant Group (n=16) | Appropriate-for-dates Infant Group (n=61) |
| --- | --- | --- | --- |
| Neonatal Comorbidities | Infection | 1 | 2 |
| Respiratory distress | 1 | 2 |
| CoA/VSD | 1 | 0 |
| VATER association | 1 | 0 |
| Maternal complications | Underweight | 5 | 13 |
| Anemia | 4 | 20 |
| Imminent preterm birth | 3 | 3 |
| Obesity | 3 | 8 |
| Hypothyroidism | 3 | 4 |
| GDM | 2 | 8 |
| Pre-Existing hypertension | 2 | 1 |
| Panic disorder | 2 | 0 |
| Pre-Existing Diabetes | 1 | 1 |
| HDP | 1 | 3 |
| PCOS | 1 | 4 |
| GBS colonization | 1 | 2 |
| Clinical Chorioamnionitis | 1 | 1 |
| PROM | 1 | 3 |
| Oligohydramnios | 1 | 0 |
| Polyhydramnios | 1 | 0 |
| Anxiety disorder | 1 | 1 |
| FGR | 3 | 1 |
| Learning disability | 0 | 1 |
| Depression | 0 | 1 |
| JIA | 0 | 1 |
| Migraine | 0 | 1 |
| Graves' disease | 0 | 1 |

CoA/VSD, Coarctation of the Aorta with Ventricular Septal Defect; VATER association, Vertebral anomalies, Anal atresia, Tracheoesophageal fistula, and Renal (or Radial) anomalies; GDM, gestational diabetes mellitus; HDP; hypertensive disorders of pregnancy; PCOS, polycystic ovarian syndrome; GBS, Group B Streptococcus; CAM, Chorioamnionitis; PROM, Premature Rupture of Membranes; FGR, fetal growth restriction; JIA, juvenile idiopathic arthritis; Underweight, BMI < 18.5 kg/m2; Obesity, BMI> 25 kg/m2

**Supplementary Figure 2**

**Random forest analysis of the associations between maternal characteristics and fetal growth status (AFD and LFD)**
The figure shows the variable importance ranking derived from a random forest model that evaluated the contribution of maternal factors to fetal growth classification. Each bar represents the relative importance score of a maternal variable in distinguishing between appropriate-for-date (AFD) and light-for-date (LFD) infants. The horizontal bar plot depicts the feature importance scores generated by the random forest model. These scores quantify the relative contribution of each maternal characteristic to the classification of fetal growth status (AFD vs. LFD). Variables with higher importance scores, such as maternal BMI, maternal height, and maternal age, had a greater impact on the model’s predictive performance.


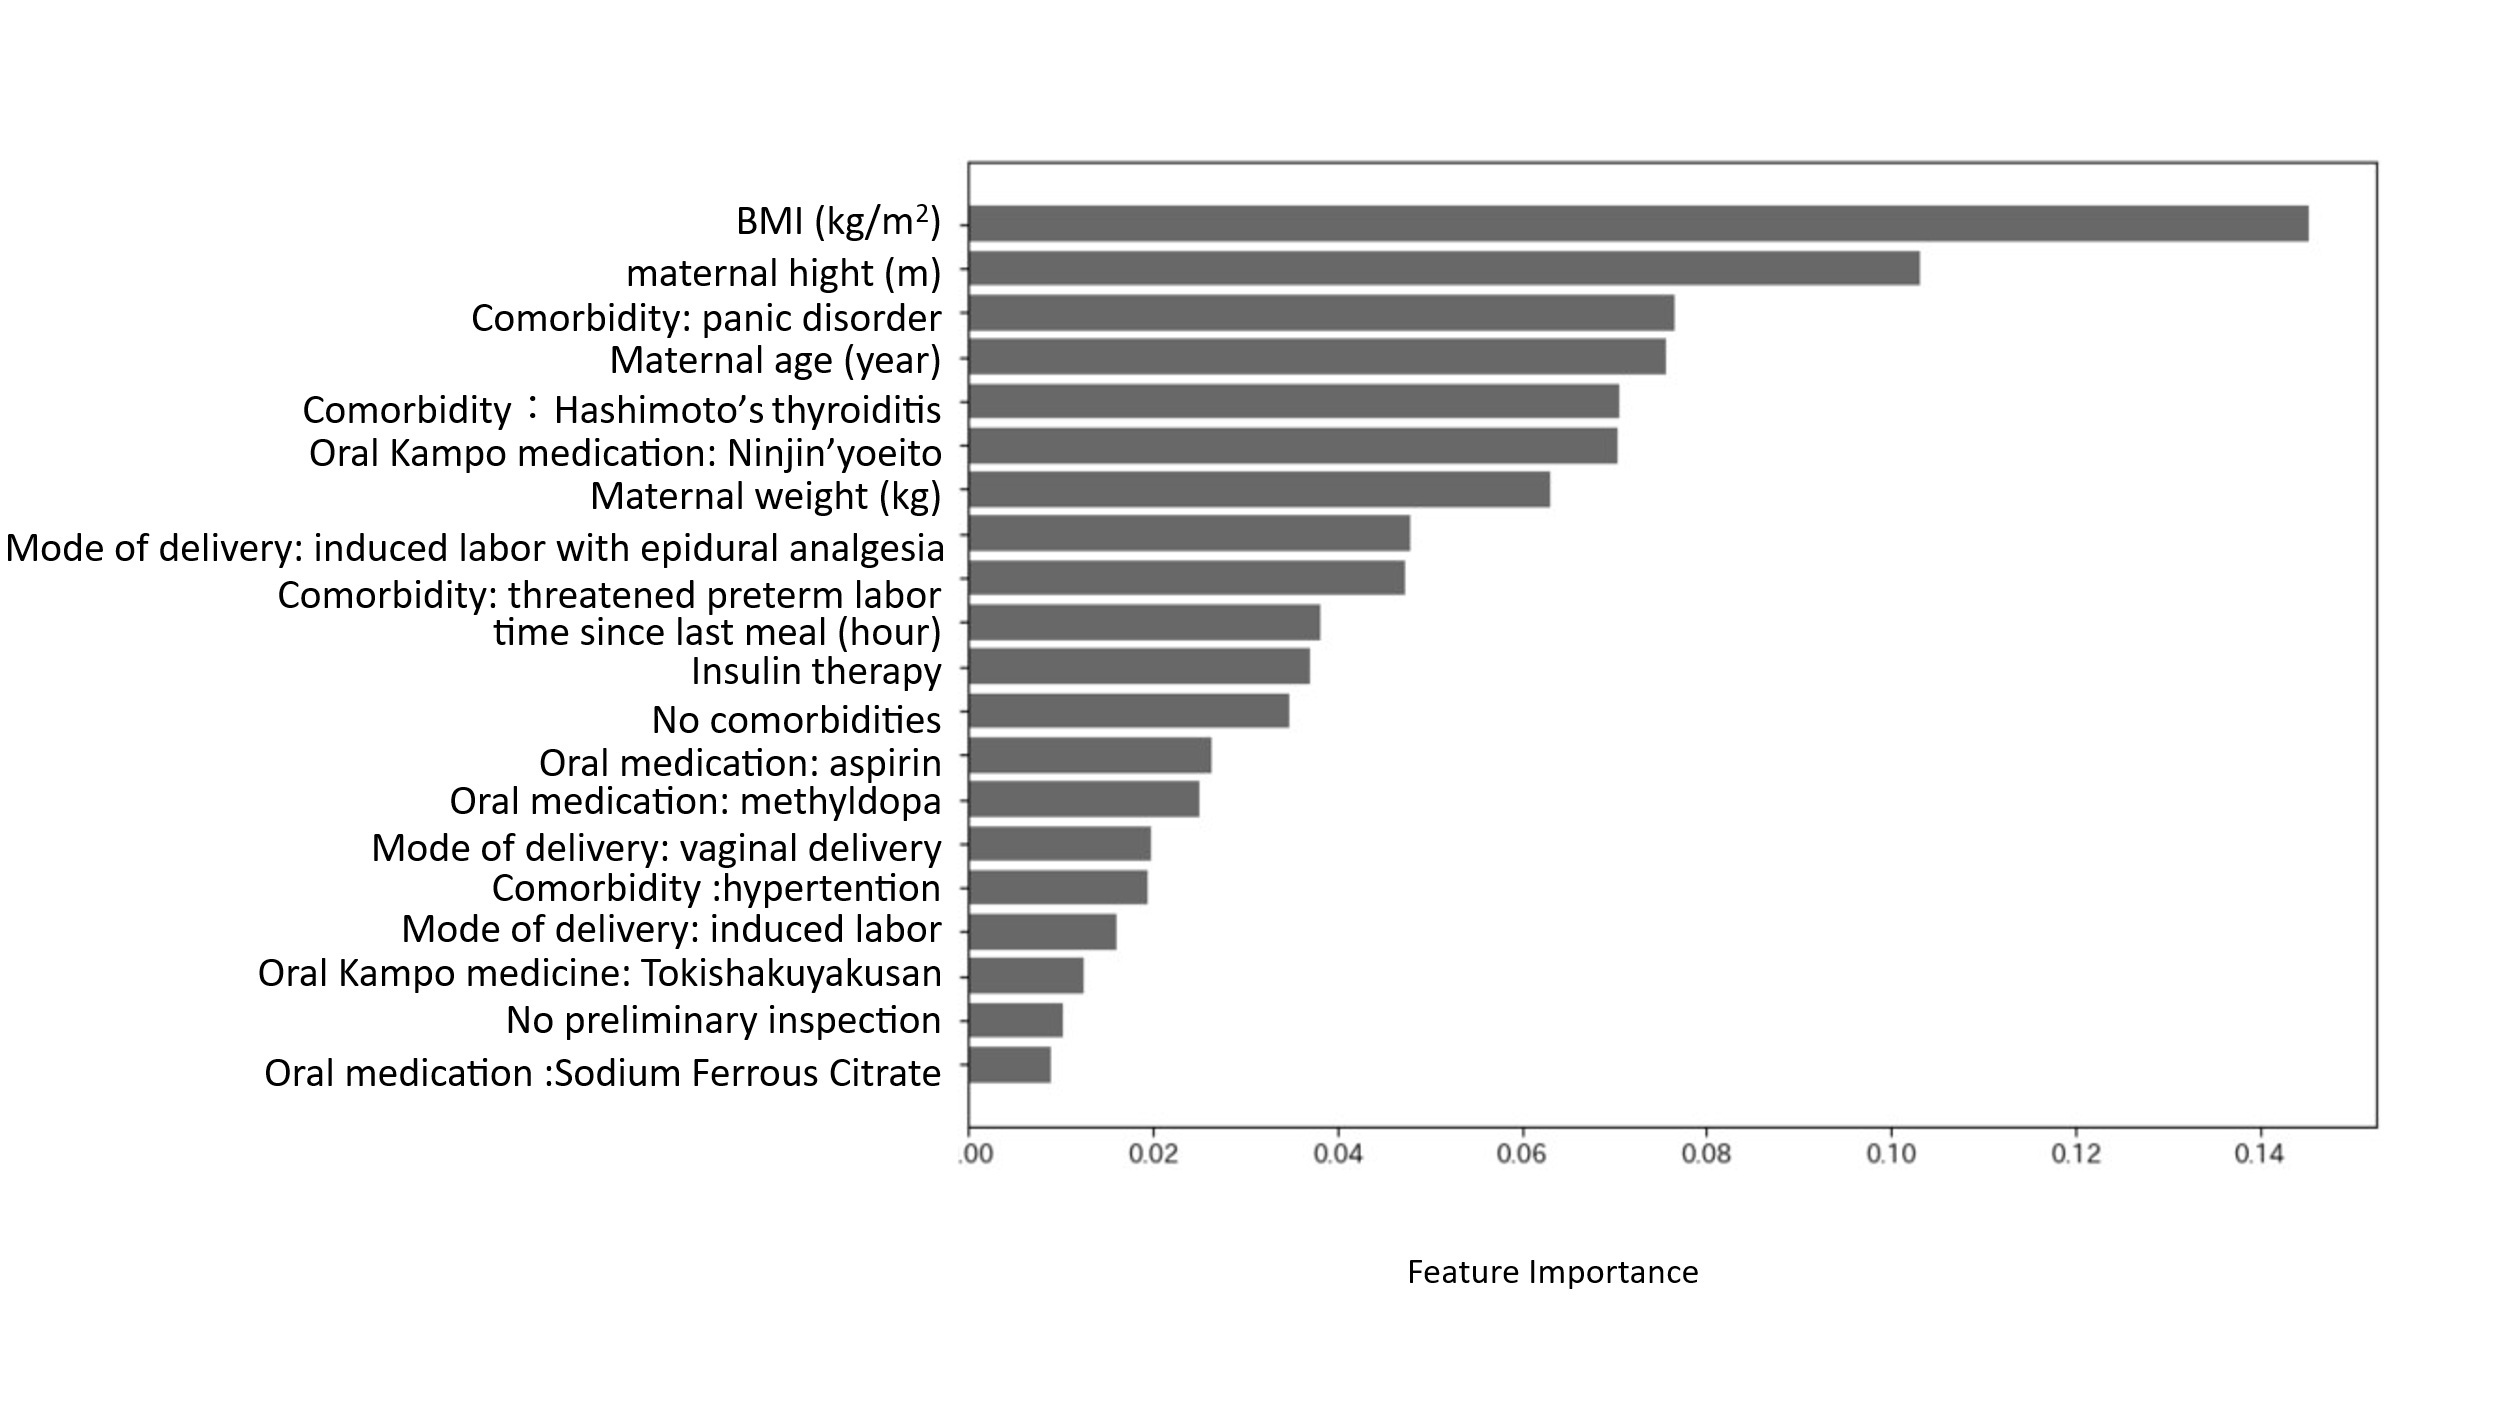

Supplement: Supplementary file 1 [file 1a501d15e84fbeecd49e3619.docx]
